# Supplementary material for: Functional Insights into the Roles of Hormones in the Dendrobium officinale-Tulasnella sp. Germinated Seed Symbiotic Association
Source: MDPI journal article supplement (doi:10.3390/ijms19113484), 2018-11-06
Supplement: s1 [file s1]

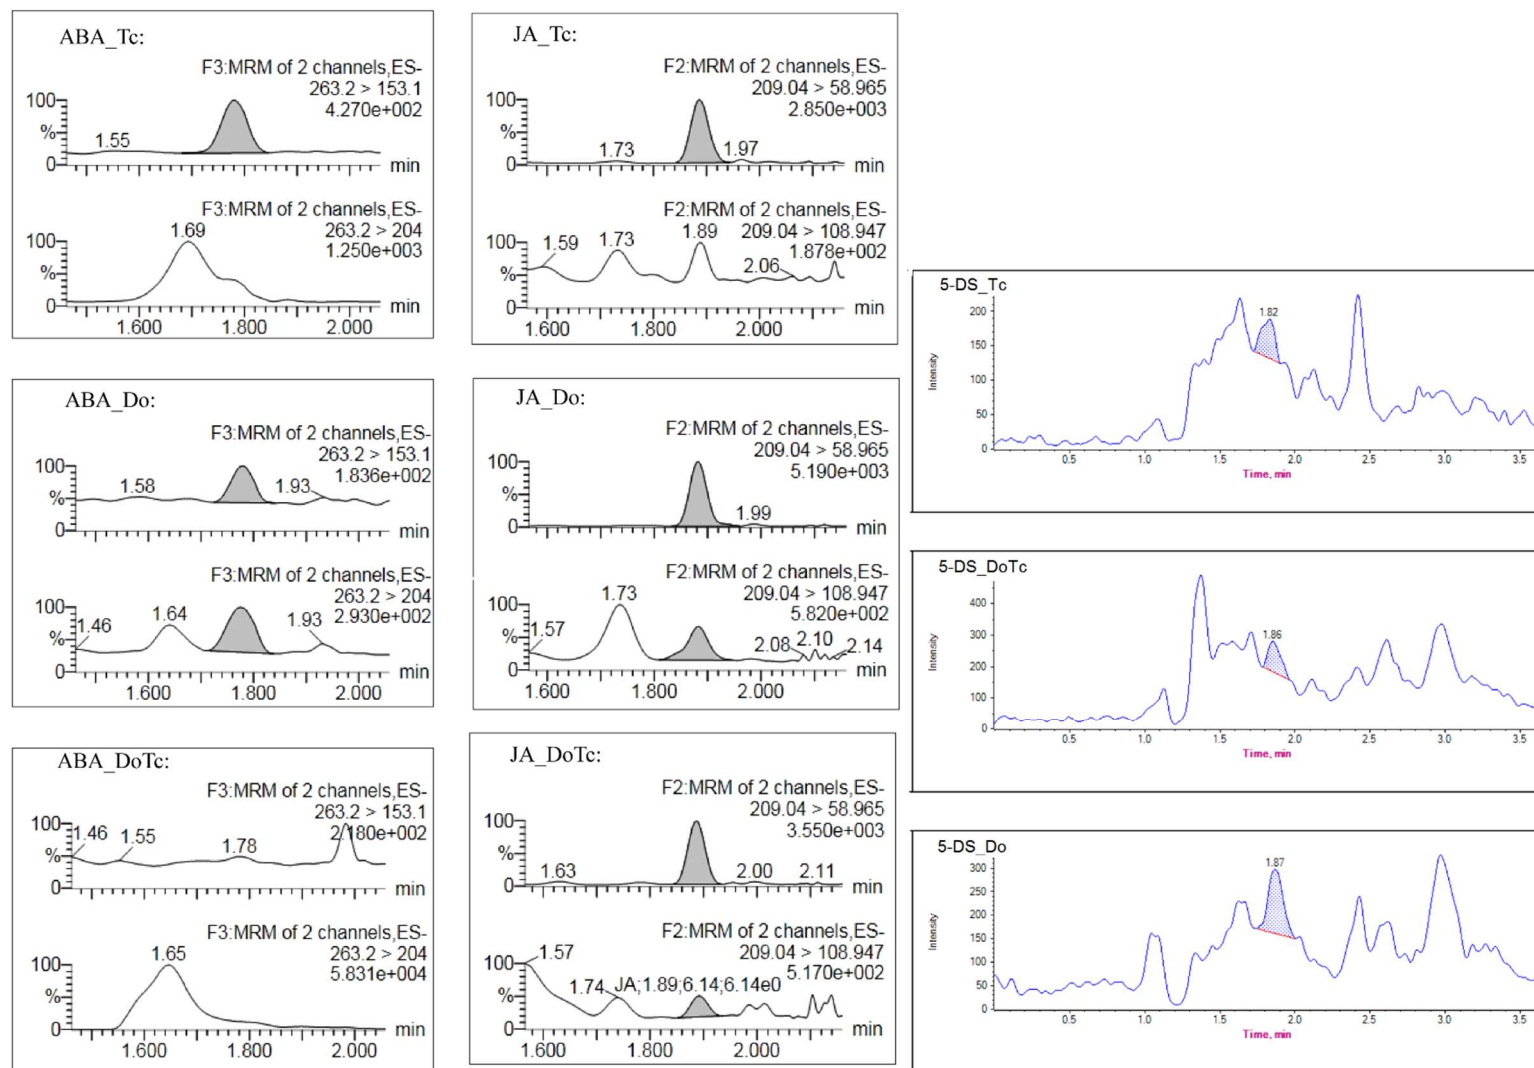

Figure S2. The UPLC-ESI-qMS/MS spectra detection results of ABA, JA and 5-DS in the symbiotic germinated seeds (DoTc), asymbiotic germinated seeds (Do) and free-living OMF *Tulasnella* sp. (Tc).
